# Supplementary material for: Association of Organizational Factors and Physician Practices’ Participation in Alternative Payment Models
Source: PubMed Central journal article supplement (PMC7118519; doi:10.1001/jamanetworkopen.2020.2019), 2020-04-02
Supplement: jamanetwopen-3-e202019-s001.pdf [file jamanetwopen-3-e202019-s001.pdf]

## Supplementary Online Content

Ouayogodé MH, Frazee T, Rich EC, Colla CH. Association of organizational factors and physician practices' participation in alternative payment models. *JAMA Netw Open*. 2020;3(4):e202019. doi:10.1001/jamanetworkopen.2020.2019

**eFigure 1.** Integration Types

**eTable 1.** Descriptive Statistics of NSHOS Physician Practices Included (N=2,061) in Versus Excluded (N=85) From the Sample Due to Survey Item Non-Response

**eTable 2.** Clinical Integration Composite Index Components From the National Survey of Healthcare Organizations and Systems

**eTable 3.** Functional Integration Composite Index Components From the National Survey of Healthcare Organizations and Systems

**eTable 4.** Cultural Integration Composite Index Components From the National Survey of Healthcare Organizations and Systems

**eFigure 2.** Distribution of Alternative Payment Models Across NSHOS Physician Practices by Model Type (N=2,061)

**eFigure 3.** Physician Practice Participation Rates by Individual Alternative Payment Model Category (N=2,061)

**eTable 5.** Matrix of Pair-Wise Correlations Between the Different Types of Integration

**eTable 6.** Association Between Physician Practices' Characteristics and Participation in Alternative Payment Models (Test for Proportional Odds Assumption)

**eTable 7.** Association Between Physician Practices' Characteristics and Participation in Distinct Alternative Payment Models (Logit Regression Model)

**eTable 8.** Association Between Physician Practices' Characteristics and Participation in Alternative Payment Models (Generalized Estimating Equations Regression Model)

**eTable 9.** Association Between Physician Practices' Characteristics and Participation in Alternative Payment Models (Controlling for Patient Care Revenue Sources)

**eTable 10.** Association Between Physician Practices' Characteristics and Participation in Alternative Payment Models (Controlling for Payment Reform Availability and Market Concentration)

**eTable 11.** Association Between Physician Practices' Characteristics and Participation in Distinct Alternative Payment Models Stratified by Practice's Health System Type

This supplementary material has been provided by the authors to give readers additional information about their work.

**eFigure 1. Integration Types**

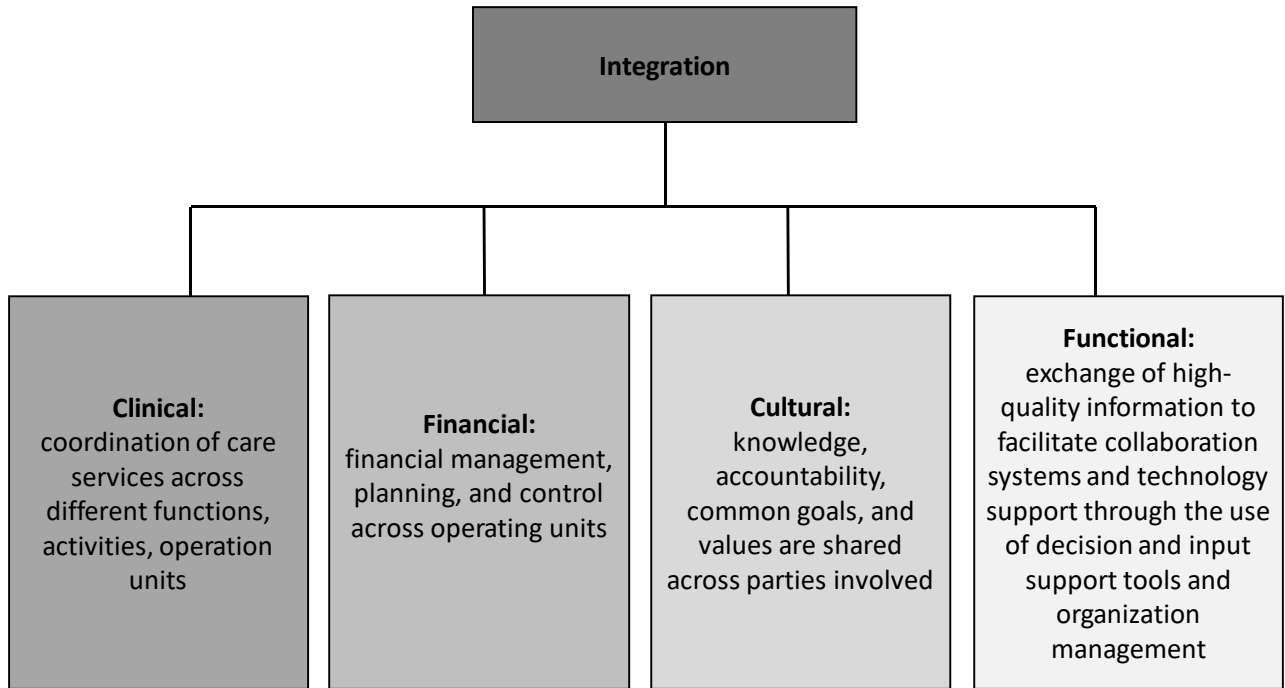

**Sources:** Devers KJ, Shortell SM, Gillies RR, Anderson DA, Mitchell JB, Erickson K. Implementing organized delivery systems: an integration scorecard. *Health Care Management Review*. 1994;19(3):7-20.  
Gillies RR, Shortell SM, Anderson DA, Mitchell JB, Morgan KL. Conceptualizing and measuring integration: findings from the health systems integration study. *Journal of Healthcare Management*. 1993;38(4):467.  
May C, Finch T, Mair F, et al. Understanding the implementation of complex interventions in health care: the normalization process model. *BMC Health Services Research*. 2007;7(1):148.  
Solberg LI, Asche SE, Shortell SM, et al. Is Integration in Large Medical Groups Associated with Quality. *American Journal of Managed Care*. 2009;15(6):e34-e41.  
Burns LR, Muller RW. Hospital-Physician Collaboration: Landscape of Economic Integration and Impact on Clinical Integration. *The Milbank Quarterly*. 2008;86(3):375-434.

Note: The figure was created by authors from information compiled from sources listed above.

**eTable 1.** Descriptive statistics of NSHOS physician practices included (N=2,061) in versus excluded (N=85) from the sample due to survey item non-response

| Characteristics                                                                                                 | Mean/Prop | Std. Err. | Mean/Prop | Std. Err. | p-value† |
|-----------------------------------------------------------------------------------------------------------------|-----------|-----------|-----------|-----------|----------|
| <b>System Type (=1 if yes), % (SE)<sup>a</sup></b>                                                              |           |           |           |           |          |
| Independent                                                                                                     | 40.9      | (2.4)     | 49.9      | (8.8)     | 0.3050   |
| Medical group                                                                                                   | 14.2      | (1.3)     | 16.0      | (5.5)     | 0.7410   |
| Simple system                                                                                                   | 11.4      | (1.1)     | 6.4       | (2.3)     | 0.0367   |
| Complex system                                                                                                  | 33.5      | (2.9)     | 27.7      | (6.8)     | 0.3623   |
| Physician practice's health system includes an Academic Medical Center (=1 if yes), % (SE)                      | 26.1      | (2.9)     | 15.5      | (5.3)     | 0.0189   |
| <b>Practice size (=1 if yes), % (SE)<sup>b</sup></b>                                                            |           |           |           |           |          |
| Small (<10 physicians)                                                                                          | 76.5      | (1.5)     | 92.1      | (5.9)     | 0.0094   |
| Medium (10-20 physicians)                                                                                       | 11.3      | (1.1)     | 5.2       | (5.2)     | 0.2410   |
| Large (21+ physicians)                                                                                          | 12.2      | (1.0)     | 2.7       | (2.8)     | 0.0012   |
| Mean proportion of primary care physicians, % (SE) <sup>c</sup>                                                 | 64.7      | (0.9)     | 67.9      | (7.9)     | 0.6810   |
| <b>Mean percentage of practice's annual patient care revenues coming from, % (SE)<sup>d</sup></b>               |           |           |           |           |          |
| Commercial health insurance                                                                                     | 40.3      | (0.8)     | 42.6      | (5.4)     | 0.6794   |
| Medicare                                                                                                        | 31.9      | (0.7)     | 30.5      | (3.2)     | 0.6496   |
| Medicaid                                                                                                        | 16.8      | (0.7)     | 18.6      | (4.0)     | 0.6535   |
| Self-pay                                                                                                        | 6.8       | (0.5)     | 6.0       | (1.5)     | 0.6298   |
| Other                                                                                                           | 4.1       | (0.3)     | 2.3       | (0.6)     | 0.0084   |
| Market competition for patients in the outpatient care intense (=1 if yes), % (SE) <sup>e</sup>                 | 72.4      | (1.4)     | 80.6      | (7.4)     | 0.2720   |
| <b>Major barriers to practice's use of evidence-based care delivery innovations (1=yes), % (SE)<sup>f</sup></b> |           |           |           |           |          |
| Lack of a process for identifying beneficial innovations                                                        | 25.4      | (1.4)     | 24.5      | (7.6)     | 0.9018   |
| Lack of a process for disseminating information about innovations                                               | 25.2      | (1.4)     | 21.2      | (7.1)     | 0.5736   |
| Not enough time to implement                                                                                    | 46.3      | (1.6)     | 36.0      | (8.2)     | 0.2127   |
| Insufficient financial resources to implement                                                                   | 47.4      | (1.6)     | 38.9      | (8.8)     | 0.3311   |
| Lack the necessary knowledge/expertise to implement                                                             | 25.2      | (1.4)     | 17.9      | (6.6)     | 0.2746   |
| Lack of incentives to implement                                                                                 | 34.7      | (1.6)     | 30.8      | (8.3)     | 0.6454   |
| <b>Integration Variables, mean (SE)<sup>g</sup></b>                                                             |           |           |           |           |          |
| Clinical: Composite Index {0,1}                                                                                 | 0.58      | (0.01)    | 0.52      | (0.05)    | 0.2115   |
| Functional: Composite Index {0,1}                                                                               | 0.57      | (0.01)    | 0.50      | (0.04)    | 0.0835   |
| Cultural: Composite Index {0,1} <sup>h</sup>                                                                    | 0.64      | (0.01)    | 0.60      | (0.04)    | 0.4195   |
| Financial: System wide financial planning and revenue sharing (=1 if yes), % (SE) <sup>i</sup>                  | 46.9      | (2.0)     | 48.5      | (10.4)    | 0.8778   |
| <b>Geography, % (SE)</b>                                                                                        |           |           |           |           |          |
| <b>Urbanicity (=1 if yes)</b>                                                                                   |           |           |           |           |          |
| Urban                                                                                                           | 82.8      | (1.4)     | 83.7      | (5.9)     | 0.8794   |
| Suburban                                                                                                        | 10.0      | (1.2)     | 12.7      | (5.3)     | 0.6249   |
| Rural                                                                                                           | 7.2       | (0.8)     | 3.7       | (2.9)     | 0.2373   |
| <b>Region (=1 if yes)</b>                                                                                       |           |           |           |           |          |
| Northeast                                                                                                       | 21.4      | (1.7)     | 14.4      | (6.0)     | 0.2572   |
| Midwest                                                                                                         | 24.9      | (2.1)     | 20.9      | (5.5)     | 0.4613   |
| South                                                                                                           | 29.5      | (1.9)     | 21.8      | (6.6)     | 0.2448   |
| West                                                                                                            | 24.2      | (2.4)     | 42.9      | (9.1)     | 0.0363   |
| Number of Practices (N)                                                                                         | 2061      |           | 85        |           |          |

Abbreviation: NSHOS: National Survey of Healthcare Organizations and Systems; EHR: electronic health records.

Notes: Included (excluded) sample <sup>a</sup> (N=84). <sup>b</sup> (N=21). <sup>c</sup> (N=14). <sup>d</sup> N=1,669(44). <sup>e</sup> (N=63). <sup>f</sup> N=2,020(76). <sup>g</sup> Each integration measure composite index {0,1} is a simple weighted sum of components with equal weight allocated to each component. <sup>h</sup> (N=84). <sup>i</sup> Only practices operating within a larger organization were asked that question, N=1,413(43). Standard errors, which are obtained after accounting for the survey nature of the data in estimating means of each covariate, are reported in parentheses in lieu of standard deviations. Urban, suburban, and rural areas are defined based on rural-urban commuting area classifications. Urban areas include metropolitan area (core, high commuting, low commuting). Suburban areas include micropolitan areas (core, high commuting, low commuting). Rural areas include small towns (core, high commuting, low commuting), rural areas, and ZIP codes tabulation areas not coded. All statistics are adjusted for sampling weights. <sup>†</sup> P-values are reported for testing linear hypotheses for differences in means or proportions between the included practices and excluded practices.

**eTable 2.** Clinical Integration Composite Index Components from the National Survey of Healthcare Organizations and Systems

|                                                                                                                   |
|-------------------------------------------------------------------------------------------------------------------|
| <b>Variable</b>                                                                                                   |
| <b>q18: How long has your practice had on-site behavioral clinicians?</b>                                         |
| <b>q23: For your complex, high need patients, how often:</b>                                                      |
| q23a: Is a care manager involved in helping the patient coordinate care across clinicians?                        |
| <b>q24: Which of the following are routinely in place to facilitate complex and high need patients discharge?</b> |
| q24a: Referral to community health-related social services (1=Yes)                                                |
| q24b: Communication with patient within 72 hours of discharge (1=Yes)                                             |
| q24c: Home visit after discharge (1=Yes)                                                                          |
| q24d: Discharge summaries sent to primary care clinician within 72 hours of discharge (1=Yes)                     |
| q24e: Standardized process to reconcile multiple medications (1=Yes)                                              |
| <b>q37: Does your practice's EHR connect directly to the EHR at the main hospital that your patients use?</b>     |

Abbreviation: EHR: electronic health records.

**eTable 3.** Functional Integration Composite Index Components from the National Survey of Healthcare Organizations and Systems

| <b>Variable</b>                                                                                                            |
|----------------------------------------------------------------------------------------------------------------------------|
| <b>q6: How often do these things happen within your practice?</b>                                                          |
| q6h: Our physicians deliver clinical care for patients using the same protocols and pathways                               |
| <b>q36: How often do clinicians in your practice have access to the following when they need it?</b>                       |
| q36a: Notification that a patient was admitted to a local hospital                                                         |
| q36b: Notification that a patient visited an emergency department at a local hospital                                      |
| q36c: Discharge summaries from local hospitals                                                                             |
| q36d: Labs/test results                                                                                                    |
| q36e: Behavioral health notes                                                                                              |
| q36f: Recommendations and results from specialist consultations                                                            |
| q36g: Information from groups that are not using your EHR                                                                  |
| q36h: Information from local, public social service agencies (e.g. county or city shelters, social workers, food programs) |
| <b>q48: Does your practice collect information about individual clinician performance for:</b>                             |
| q48a: Diabetes (1=Yes)                                                                                                     |
| q48b: Congestive heart failure (1=Yes)                                                                                     |
| q48c: Asthma / COPD (1=Yes)                                                                                                |
| q48d: Coronary artery disease (1=Yes)                                                                                      |
| q48e: Hypertension (1=Yes)                                                                                                 |
| q48f: Depression (1=Yes)                                                                                                   |
| q48g: Serious mental illness (1=Yes)                                                                                       |
| <b>q49: Management of information about individual clinician performance for:</b>                                          |
| q49a: Preventive services (e.g. immunizations, screening)                                                                  |
| q49a1: Use for feedback                                                                                                    |
| q49a2: Use for internal quality improvement                                                                                |
| q49b: Patient experiences (e.g. patient satisfaction or CAHPS scores)                                                      |
| q49b1: Use for feedback                                                                                                    |
| q49b2: Use for internal quality improvement                                                                                |

Abbreviation: EHR: electronic health records; COPD: chronic obstructive pulmonary disease; CAHPS: consumer assessment of healthcare providers and systems; HEDIS: healthcare effectiveness data and information set.

**eTable 3.** Functional Integration Composite Index Components from the National Survey of Healthcare Organizations and Systems (*Continued*)

| <b>Variable</b>                                                                                                                                                      |
|----------------------------------------------------------------------------------------------------------------------------------------------------------------------|
| <b>q49: Management of information about individual clinician performance for (<i>Continued</i>):</b>                                                                 |
| q49c: Overuse of medical tests or procedures (e.g. high cost imaging)                                                                                                |
| q49c1: Use for feedback                                                                                                                                              |
| q49c2: Use for internal quality improvement                                                                                                                          |
| q49d: Underuse of medical test or procedures (e.g. HEDIS)                                                                                                            |
| q49d1: Use for feedback                                                                                                                                              |
| q49d2: Use for internal quality improvement                                                                                                                          |
| q49e: Use of acute care services (e.g. readmissions, emergency room use)                                                                                             |
| q49e1: Use for feedback                                                                                                                                              |
| q49e2: Use for internal quality improvement                                                                                                                          |
| q49f: Clinical quality (e.g. blood pressure control, diabetes control, complication rates)                                                                           |
| q49f1: Use for feedback                                                                                                                                              |
| q49f2: Use for internal quality improvement                                                                                                                          |
| q49g: Total inpatient cost of care                                                                                                                                   |
| q49g1: Use for feedback                                                                                                                                              |
| q49g2: Use for internal quality improvement                                                                                                                          |
| <b>q50: Are reports shared within the group in a way that an individual clinician can compare their performance to other clinicians within the practice? (1=Yes)</b> |

Abbreviation: EHR: electronic health records; COPD: chronic obstructive pulmonary disease; CAHPS: consumer assessment of healthcare providers and systems; HEDIS: healthcare effectiveness data and information set.

**eTable 4.** Cultural Integration Composite Index Components from the National Survey of Healthcare Organizations and Systems

| Variable                                                                                                                                 |
|------------------------------------------------------------------------------------------------------------------------------------------|
| <b>q6: How often do these things happen within your practice?</b>                                                                        |
| q6a: Successful care delivery innovations are highly publicized within the practice                                                      |
| q6b: Team members openly share patient care challenges and failures with each other                                                      |
| q6c: There is protected time given to generate new ideas and innovations                                                                 |
| q6d: We encourage trying new ideas to see if they work                                                                                   |
| q6e: There is a strong sense of belonging to this practice                                                                               |
| q6f: We consider ourselves to be the testing ground for new approaches to engage patients in their care                                  |
| q6g: Team members feel safe raising concerns regarding patient care                                                                      |
| q6i: Non-clinical decisions about the practice are made by our physicians acting as a single integrated group                            |
| <b>q7: Which statement best describes your practice? (100 points distributed across response options)</b>                                |
| q7a: Our practice is a very personal place. It is a lot like an extended family. People seem to share a lot of themselves.               |
| q7b: ...is a very dynamic and entrepreneurial place. People are willing to try new things to see if they work.                           |
| q7c: ...is a very formalized and structured place. Bureaucratic procedures generally govern what people do.                              |
| q7d: ...is very production oriented. The major concern is getting the job done.                                                          |
| <b>q59: How much influence would you say that physicians in your practice have on the setting of practice priorities and strategies?</b> |

**eFigure 2.** Distribution of alternative payment models across NSHOS physician practices by model type (N=2,061)

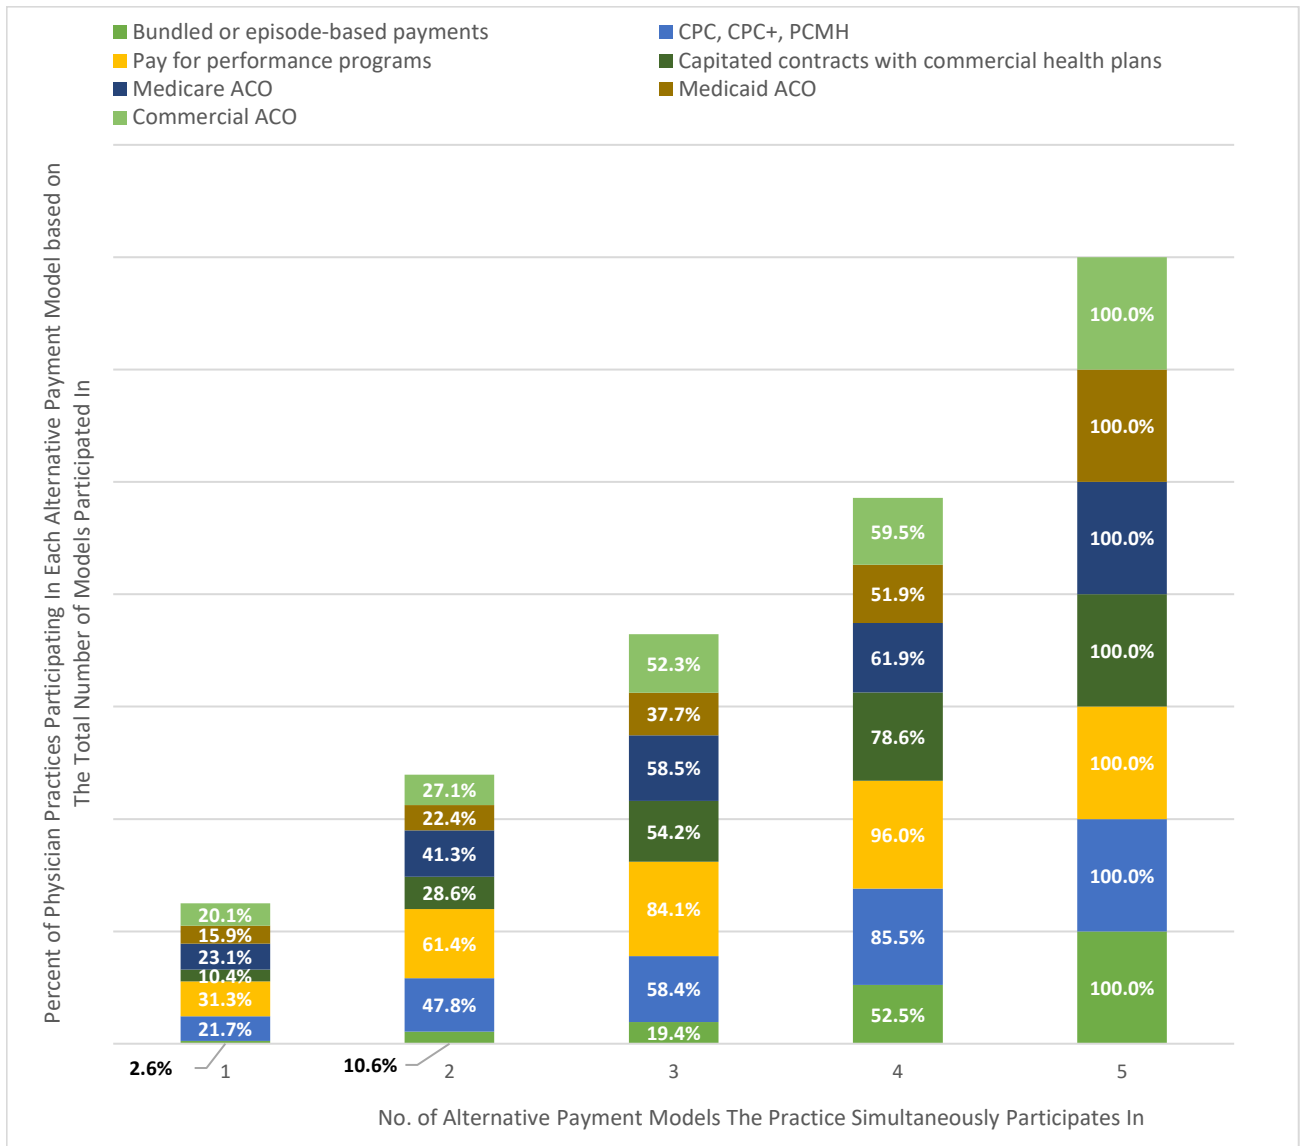

Notes: Abbreviation: NSHOS: National Survey of Healthcare Organizations and Systems. Alternative payment models included a) bundled or episode-based payments, b) comprehensive primary care (CPC), CPC+, patient centered medical homes (PCMH), c) pay for performance programs, d) capitated contracts with commercial health plans, e) accountable care organizations (ACOs) (Medicare, Medicaid, commercial). Proportions are adjusted for sampling weights.

Because the outcome variable measures the number of APMs each practice reported participating in, the only bar that adds up to 100% is the one identifying practices that reported participating into a single APM. When considering the other bars identifying physician practices reporting participation in multiple APMs, the proportions are overlapping and not mutually exclusive, therefore the sum of proportions in each of these bars exceeds 100%. For example, among physician practices reporting participating in 2 APMs (representing any combination of all 5 selected APMs), 10.6% participate in bundled or episode-based payments, nearly half (47.8%) participate in CPC, CPC+, or PCMH, 61.4% participate in pay-for-performance programs, 28.6% participate in capitated contracts with commercial health plans, 41.3% participate in Medicare ACO models, 22.4% participate in Medicaid ACO models, and 27.1% participate in commercial ACO models. A similar description could be made for physician practices reporting participating in 3, 4, or 5 APMs.



**eFigure 3.** Physician practice participation rates by individual alternative payment model category (N=2,061)

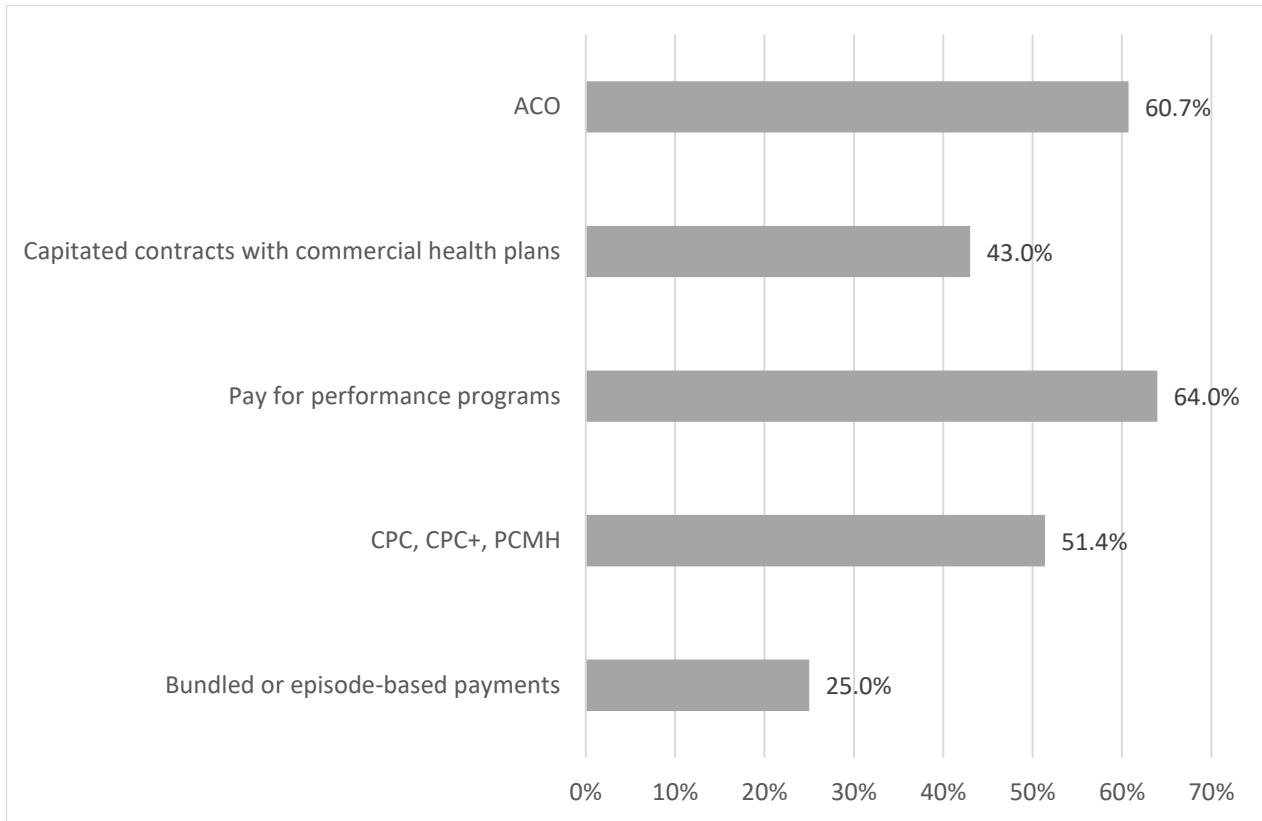

Notes: Alternative payment models included a) bundled or episode-based payments, b) comprehensive primary care (CPC), CPC+, patient centered medical homes (PCMH), c) pay for performance programs, d) capitated contracts with commercial health plans, e) accountable care organizations (ACO) (Medicare, Medicaid, commercial).

**eTable 5.** Matrix of pair-wise correlations between the different types of integration

| <b>Integration Type</b>                                                          | Clinical:<br>Composite<br>Index | Functional:<br>Composite<br>Index | Cultural:<br>Composite<br>Index | Financial:<br>System wide<br>sharing |
|----------------------------------------------------------------------------------|---------------------------------|-----------------------------------|---------------------------------|--------------------------------------|
| Clinical: Composite Index {0,1}                                                  | 1                               |                                   |                                 |                                      |
| Functional: Composite Index {0,1}                                                | 0.3765***                       | 1                                 |                                 |                                      |
| Cultural: Composite Index {0,1}                                                  | 0.1665***                       | 0.2966***                         | 1                               |                                      |
| Financial: System wide financial<br>planning and resource sharing (=1 if<br>yes) | 0.0279                          | -0.0116                           | -0.1264***                      | 1                                    |

Notes: Inference: \*\*\* $p < 0.01$  after Bonferroni adjustment

**eTable 6.** Association between physician practices' characteristics and participation in alternative payment models (Test for proportion odds assumption)

|                                                                       | (1)          | (2)      | (3)      | (4)      | (5)      |
|-----------------------------------------------------------------------|--------------|----------|----------|----------|----------|
| Variables                                                             | Coeff        | Coeff    | Coeff    | Coeff    | Coeff    |
| <b>Practice Characteristics</b>                                       |              |          |          |          |          |
| Practice's health system type (=1 if yes)                             |              |          |          |          |          |
| Independent ( <i>reference</i> )                                      |              |          |          |          |          |
| Medical group                                                         | 0.92***      | 0.92***  | 0.92***  | 0.92***  | 0.92***  |
|                                                                       | (0.18)       | (0.18)   | (0.18)   | (0.18)   | (0.18)   |
| Simple system                                                         | 0.40**       | 0.40**   | 0.40**   | 0.40**   | 0.40**   |
|                                                                       | (0.16)       | (0.16)   | (0.16)   | (0.16)   | (0.16)   |
| Complex system                                                        | 0.31         | 0.27     | 0.53***  | 0.79***  | 0.94***  |
|                                                                       | (0.24)       | (0.21)   | (0.18)   | (0.19)   | (0.24)   |
| Practice size (=1 if yes)                                             |              |          |          |          |          |
| Small (<10 physicians) ( <i>reference</i> )                           |              |          |          |          |          |
| Medium (10-20 physicians)                                             | 0.24         | 0.24     | 0.24     | 0.24     | 0.24     |
|                                                                       | (0.17)       | (0.17)   | (0.17)   | (0.17)   | (0.17)   |
| Large (21+ physicians)                                                | 0.17         | 0.17     | 0.17     | 0.17     | 0.17     |
|                                                                       | (0.16)       | (0.16)   | (0.16)   | (0.16)   | (0.16)   |
| Mean proportion of primary care physicians                            | 0.15         | 0.15     | 0.15     | 0.15     | 0.15     |
|                                                                       | (0.23)       | (0.23)   | (0.23)   | (0.23)   | (0.23)   |
| Market competition for patients in the outpatient intense (=1 if yes) | 0.14         | 0.14     | 0.14     | 0.14     | 0.14     |
|                                                                       | (0.12)       | (0.12)   | (0.12)   | (0.12)   | (0.12)   |
| <b>Integration†</b>                                                   |              |          |          |          |          |
| Clinical: Composite Index {0,1}                                       | 1.55***      | 1.55***  | 1.55***  | 1.55***  | 1.55***  |
|                                                                       | (0.37)       | (0.37)   | (0.37)   | (0.37)   | (0.37)   |
| Functional: Composite Index {0,1}                                     | 1.44***      | 1.44***  | 1.44***  | 1.44***  | 1.44***  |
|                                                                       | (0.38)       | (0.38)   | (0.38)   | (0.38)   | (0.38)   |
| Cultural: Composite Index {0,1}                                       | -0.40        | -0.40    | -0.40    | -0.40    | -0.40    |
|                                                                       | (0.32)       | (0.32)   | (0.32)   | (0.32)   | (0.32)   |
| <b>Geography</b>                                                      |              |          |          |          |          |
| Urbanicity (=1 if yes)                                                |              |          |          |          |          |
| Urban ( <i>reference</i> )                                            |              |          |          |          |          |
| Suburban                                                              | -0.34        | -0.34    | -0.34    | -0.34    | -0.34    |
|                                                                       | (0.27)       | (0.27)   | (0.27)   | (0.27)   | (0.27)   |
| Rural                                                                 | -0.11        | -0.11    | -0.11    | -0.11    | -0.11    |
|                                                                       | (0.22)       | (0.22)   | (0.22)   | (0.22)   | (0.22)   |
| Region (=1 if yes)                                                    |              |          |          |          |          |
| Northeast ( <i>reference</i> )                                        |              |          |          |          |          |
| Midwest                                                               | -0.76***     | -0.76*** | -0.76*** | -0.76*** | -0.76*** |
|                                                                       | (0.17)       | (0.17)   | (0.17)   | (0.17)   | (0.17)   |
| South                                                                 | -0.77***     | -0.77*** | -0.77*** | -0.77*** | -0.77*** |
|                                                                       | (0.17)       | (0.17)   | (0.17)   | (0.17)   | (0.17)   |
| West                                                                  | -0.46**      | -0.46**  | -0.46**  | -0.46**  | -0.46**  |
|                                                                       | (0.18)       | (0.18)   | (0.18)   | (0.18)   | (0.18)   |
| <b>Wald test of parallel lines assumption</b>                         |              |          |          |          |          |
| F- statistic [p-value]                                                | 1.1 [0.2828] |          |          |          |          |
| Observations                                                          | 2061         |          |          |          |          |

Abbreviation: EHR: electronic health record. Notes: †Each integration measure composite index {0,1} is a simple weighted sum of components with equal weight allocated to each component. Each column presents results from the regression at each of the (6-1=5; {0,1,2,3,4}) values taken by the dependent variable (participation in alternative payment models={0,1,2,3,4,5}). Generalized ordered logit regression model, to do a global test of the proportional odds/parallel linear assumption, was estimated. The model also tested whether a partial proportional odds model could fit the data and regression coefficients (coeff) were reported. Standard errors are in parentheses. Inference: \* p<0.10, \*\* p<0.05, \*\*\* p<0.01

**eTable 7.** Association between physician practices' characteristics and participation in distinct alternative payment models (Logit regression model)

|                                                                       | (1)        | (2)        | (3)        | (4)        | (5)        |
|-----------------------------------------------------------------------|------------|------------|------------|------------|------------|
| Variables                                                             | Odds Ratio | Odds Ratio | Odds Ratio | Odds Ratio | Odds Ratio |
| <b>Practice Characteristics</b>                                       |            |            |            |            |            |
| Practice's health system type (=1 if yes)                             |            |            |            |            |            |
| Independent ( <i>reference</i> )                                      |            |            |            |            |            |
| Medical group                                                         | 2.06***    | 2.39***    | 1.71***    | 1.68***    | 1.77***    |
|                                                                       | (0.45)     | (0.53)     | (0.34)     | (0.32)     | (0.36)     |
| Simple system                                                         | 1.44       | 1.65**     | 1.16       | 1.34       | 1.27       |
|                                                                       | (0.33)     | (0.34)     | (0.24)     | (0.26)     | (0.26)     |
| Complex system                                                        | 1.87***    | 1.38*      | 1.30       | 1.52**     | 1.61**     |
|                                                                       | (0.39)     | (0.26)     | (0.26)     | (0.27)     | (0.33)     |
| Practice size (=1 if yes)                                             |            |            |            |            |            |
| Small (<10 physicians) ( <i>reference</i> )                           |            |            |            |            |            |
| Medium (10-20 physicians)                                             | 1.40       | 1.30       | 0.94       | 0.96       | 1.31       |
|                                                                       | (0.37)     | (0.33)     | (0.20)     | (0.19)     | (0.30)     |
| Large (21+ physicians)                                                | 1.51***    | 1.26       | 1.07       | 1.06       | 0.80       |
|                                                                       | (0.26)     | (0.25)     | (0.22)     | (0.21)     | (0.16)     |
| Mean proportion of primary care physicians                            | 0.78       | 0.85       | 2.13***    | 1.48       | 0.77       |
|                                                                       | (0.23)     | (0.23)     | (0.60)     | (0.39)     | (0.22)     |
| Market competition for patients in the outpatient intense (=1 if yes) | 1.22       | 1.12       | 0.96       | 1.01       | 1.16       |
|                                                                       | (0.20)     | (0.16)     | (0.14)     | (0.14)     | (0.17)     |
| <b>Integration†</b>                                                   |            |            |            |            |            |
| Clinical: Composite Index {0,1}                                       | 3.50**     | 6.52***    | 2.12*      | 1.92*      | 2.36**     |
|                                                                       | (1.56)     | (2.52)     | (0.90)     | (0.74)     | (0.96)     |
| Functional: Composite Index {0,1}                                     | 2.54*      | 6.52***    | 2.72**     | 1.01       | 4.27***    |
|                                                                       | (1.32)     | (2.90)     | (0.15)     | (0.38)     | (1.74)     |
| Cultural: Composite Index {0,1}                                       | 0.77       | 0.48*      | 0.75       | 1.00       | 1.02       |
|                                                                       | (0.31)     | (0.18)     | (0.29)     | (0.33)     | (0.37)     |
| <b>Geography</b>                                                      |            |            |            |            |            |
| Urbanicity (=1 if yes)                                                |            |            |            |            |            |
| Urban ( <i>reference</i> )                                            |            |            |            |            |            |
| Suburban                                                              | 1.67       | 0.97       | 0.67       | 0.53**     | 0.75       |
|                                                                       | (0.54)     | (0.30)     | (0.17)     | (0.14)     | (0.20)     |
| Rural                                                                 | 1.28       | 1.35       | 1.55       | 0.61*      | 0.56**     |
|                                                                       | (0.33)     | (0.36)     | (0.43)     | (0.15)     | (0.14)     |
| Region (=1 if yes)                                                    |            |            |            |            |            |
| Northeast ( <i>reference</i> )                                        |            |            |            |            |            |
| Midwest                                                               | 0.63**     | 0.49***    | 0.50***    | 0.70**     | 0.56***    |
|                                                                       | (0.13)     | (0.10)     | (0.10)     | (0.13)     | (0.11)     |
| South                                                                 | 0.76       | 0.50***    | 0.56***    | 0.60**     | 0.52***    |
|                                                                       | (0.16)     | (0.10)     | (0.11)     | (0.12)     | (0.11)     |
| West                                                                  | 0.91       | 0.54***    | 0.70       | 1.15       | 0.49***    |
|                                                                       | (0.21)     | (0.12)     | (0.16)     | (0.23)     | (0.11)     |
| Observations                                                          | 2061       | 2061       | 2061       | 2061       | 2061       |

Abbreviation: EHR: electronic health record.

Notes: †Each integration measure composite index {0,1} is a simple weighted sum of components with equal weight allocated to each component. Each column presents results from separate regressions: (1) Bundled or episode-based payments ; (2) CPC, CPC+, PCMH; (3) Pay for performance programs; (4) Capitated contracts with commercial health plans; (5) ACO. Logit regression models, to capture participation in individual alternative payment models, were estimated and odds ratios were reported. Standard errors are in parentheses. Inference: \* p<0.10, \*\* p<0.05, \*\*\* p<0.01

**eTable 8.** Association between physician practices' characteristics and participation in alternative payment models (Generalized Estimating Equations regression model)

| Variables                                                             | Odds Ratio | Std. Err. |     |
|-----------------------------------------------------------------------|------------|-----------|-----|
| Bundled or episode-based payments ( <i>reference</i> )                |            |           |     |
| CPC, CPC+, PCMH                                                       | 3.40       | (0.28)    | *** |
| Pay for performance programs                                          | 5.90       | (0.55)    | *** |
| Capitated contracts with commercial health plans                      | 2.37       | (0.20)    | *** |
| ACO (Medicare, Medicaid or Commercial)                                | 5.10       | (0.49)    | *** |
| <b>Practice Characteristics</b>                                       |            |           |     |
| Practice's health system type (=1 if yes)                             |            |           |     |
| Independent ( <i>reference</i> )                                      |            |           |     |
| Medical group                                                         | 1.86       | (0.20)    | *** |
| Simple system                                                         | 1.34       | (0.15)    | *** |
| Complex system                                                        | 1.49       | (0.15)    | *** |
| Practice size (=1 if yes)                                             |            |           |     |
| Small (<10 physicians) ( <i>reference</i> )                           |            |           |     |
| Medium (10-20 physicians)                                             | 1.13       | (0.12)    |     |
| Large (21+ physicians)                                                | 1.10       | (0.13)    |     |
| Mean proportion of primary care physicians                            | 1.13       | (0.17)    |     |
| Market competition for patients in the outpatient intense (=1 if yes) | 1.07       | (0.09)    |     |
| <b>Integration†</b>                                                   |            |           |     |
| Clinical: Composite Index {0,1}                                       | 2.88       | (0.65)    | *** |
| Functional: Composite Index {0,1}                                     | 2.88       | (0.67)    | *** |
| Cultural: Composite Index {0,1}                                       | 0.77       | (0.16)    |     |
| <b>Geography</b>                                                      |            |           |     |
| Urbanicity (=1 if yes)                                                |            |           |     |
| Urban ( <i>reference</i> )                                            |            |           |     |
| Suburban                                                              | 0.78       | (0.13)    |     |
| Rural                                                                 | 0.95       | (0.14)    |     |
| Region (=1 if yes)                                                    |            |           |     |
| Northeast ( <i>reference</i> )                                        |            |           |     |
| Midwest                                                               | 0.58       | (0.06)    | *** |
| South                                                                 | 0.59       | (0.06)    | *** |
| West                                                                  | 0.73       | (0.08)    | *** |
| Observations                                                          | 10305      |           |     |

Abbreviation: EHR: electronic health record.

Notes: †Each integration measure composite index {0,1} is a simple weighted sum of components with equal weight allocated to each component. A generalized estimating equations (GEE) regression model with binomial distribution of outcome variable was estimated and odds ratios were reported. The dataset was re-arranged as a panel allowing each practice to have five different options/observations based on five types of alternative payment models studied, hence the increase in the number of observations (N=2061\*5=10305). The GEE model fits a generalized linear model that adjusts for within-practice correlation of participation in alternative payment models. The dependent variable is a dichotomous variable for participation in any alternative payment model. The model also estimates alternative payment model fixed effects (bundled payments is the reference) Inference: \* p<0.10, \*\* p<0.05, \*\*\* p<0.01

**eTable 9.** Association between physician practices' characteristics and participation in alternative payment models (Controlling for patient care revenue sources)

| Variables                                                             | Odds Ratio | Std. Err. |     |
|-----------------------------------------------------------------------|------------|-----------|-----|
| <b>Practice Characteristics</b>                                       |            |           |     |
| Practice's health system type (=1 if yes)                             |            |           |     |
| Independent ( <i>reference</i> )                                      |            |           |     |
| Medical group                                                         | 2.29       | (0.41)    | *** |
| Simple system                                                         | 1.60       | (0.28)    | *** |
| Complex system                                                        | 1.86       | (0.34)    | *** |
| Practice size (=1 if yes)                                             |            |           |     |
| Small (<10 physicians) ( <i>reference</i> )                           |            |           |     |
| Medium (10-20 physicians)                                             | 1.22       | (0.23)    |     |
| Large (21+ physicians)                                                | 1.03       | (0.21)    |     |
| Mean proportion of primary care physicians                            | 1.11       | (0.29)    |     |
| Market competition for patients in the outpatient intense (=1 if yes) | 1.14       | (0.15)    |     |
| <b>Integration†</b>                                                   |            |           |     |
| Clinical: Composite Index {0,1}                                       | 5.72       | (2.39)    | *** |
| Functional: Composite Index {0,1}                                     | 4.13       | (1.76)    | *** |
| Cultural: Composite Index {0,1}                                       | 0.68       | (0.25)    |     |
| Mean percentage of practice's annual patient care revenue sources     |            |           |     |
| Commercial health insurance                                           | 3.04       | (1.76)    | *   |
| Medicare                                                              | 1.38       | (0.83)    |     |
| Medicaid                                                              | 2.64       | (1.79)    |     |
| Other ( <i>reference</i> )                                            |            |           |     |
| <b>Geography</b>                                                      |            |           |     |
| Urbanicity (=1 if yes)                                                |            |           |     |
| Urban ( <i>reference</i> )                                            |            |           |     |
| Suburban                                                              | 0.72       | (0.23)    |     |
| Rural                                                                 | 0.85       | (0.22)    |     |
| Region (=1 if yes)                                                    |            |           |     |
| Northeast ( <i>reference</i> )                                        |            |           |     |
| Midwest                                                               | 0.46       | (0.08)    | *** |
| South                                                                 | 0.55       | (0.10)    | *** |
| West                                                                  | 0.67       | (0.13)    | **  |
| Observations                                                          | 1669       |           |     |

Abbreviation: EHR: electronic health record.

Notes: †Each integration measure composite index {0,1} is a simple weighted sum of components with equal weight allocated to each component. An ordered logit regression model, to capture intensity of participation in alternative payment models, was estimated and proportional odds ratios were reported. Inference: \* p<0.10, \*\* p<0.05, \*\*\* p<0.01

**eTable 10.** Association between physician practices' characteristics and participation in alternative payment models (Controlling for payment reform availability and market concentration)

| Variables                                                             | Odds Ratio | Std. Err. |     |
|-----------------------------------------------------------------------|------------|-----------|-----|
| <b>Practice Characteristics</b>                                       |            |           |     |
| Practice's health system type (=1 if yes)                             |            |           |     |
| Independent ( <i>reference</i> )                                      |            |           |     |
| Medical group                                                         | 2.43       | (0.40)    | *** |
| Simple system                                                         | 1.47       | (0.23)    | **  |
| Complex system                                                        | 1.81       | (0.31)    | *** |
| Practice size (=1 if yes)                                             |            |           |     |
| Small (<10 physicians) ( <i>reference</i> )                           |            |           |     |
| Medium (10-20 physicians)                                             | 1.30       | (0.22)    |     |
| Large (21+ physicians)                                                | 1.19       | (0.20)    |     |
| Mean proportion of primary care physicians                            | 1.11       | (0.25)    |     |
| Market competition for patients in the outpatient intense (=1 if yes) | 1.17       | (0.14)    |     |
| Payment reform availability and market concentration                  |            |           |     |
| PCMH health plan sold in state (=1 if yes)                            | 1.20       | (0.22)    |     |
| CPC+ eligible region (=1 if yes)                                      | 1.32       | (0.19)    | **  |
| HHI at the HRR level: Medicaid managed care                           | 1.50       | (1.10)    |     |
| HHI at the HRR level: Medicare advantage                              | 2.38       | (1.32)    |     |
| HHI at the HRR level: Private insurance                               | 0.62       | (0.19)    |     |
| <b>Integration†</b>                                                   |            |           |     |
| Clinical: Composite Index {0,1}                                       | 4.48       | (1.66)    | *** |
| Functional: Composite Index {0,1}                                     | 4.11       | (1.58)    | *** |
| Cultural: Composite Index {0,1}                                       | 0.69       | (0.22)    |     |
| <b>Geography</b>                                                      |            |           |     |
| Urbanicity (=1 if yes)                                                |            |           |     |
| Urban ( <i>reference</i> )                                            |            |           |     |
| Suburban                                                              | 0.69       | (0.18)    |     |
| Rural                                                                 | 0.86       | (0.20)    |     |
| Region (=1 if yes)                                                    |            |           |     |
| Northeast ( <i>reference</i> )                                        |            |           |     |
| Midwest                                                               | 0.42       | (0.07)    | *** |
| South                                                                 | 0.41       | (0.07)    | *** |
| West                                                                  | 0.59       | (0.12)    | **  |
| Observations                                                          | 2061       |           |     |

Abbreviations: EHR: electronic health record; PCMH: patient-centered medical home; CPC: comprehensive primary care; HHI: Herfindahl-Hirschman Index; HRR: Hospital referral region.

Notes: †Each integration measure composite index {0,1} is a simple weighted sum of components with equal weight allocated to each component. An ordered logit regression model, to capture intensity of participation in alternative payment models, was estimated and proportional odds ratios were reported. Inference: \* p<0.10, \*\* p<0.05, \*\*\* p<0.01

**eTable 11.** Association between physician practices' characteristics and participation in distinct alternative payment models stratified by practice's health system type

| Variables                                                             | Practice's Health System Type |                   |                     |                   |
|-----------------------------------------------------------------------|-------------------------------|-------------------|---------------------|-------------------|
|                                                                       | Independent                   | Medical Group     | Simple System       | Complex system    |
|                                                                       | Odds Ratio                    | Odds Ratio        | Odds Ratio          | Odds Ratio        |
| <b>Practice Characteristics</b>                                       |                               |                   |                     |                   |
| Practice size (=1 if yes)                                             |                               |                   |                     |                   |
| Small (<10 physicians) ( <i>reference</i> )                           |                               |                   |                     |                   |
| Medium (10-20 physicians)                                             | 1.83<br>(0.67)                | 0.80<br>(0.24)    | 0.80<br>(0.27)      | 1.05<br>(0.25)    |
| Large (21+ physicians)                                                | 1.67<br>(0.70)                | 1.30<br>(0.36)    | 1.46<br>(0.43)      | 0.93<br>(0.23)    |
| Mean proportion of primary care physicians                            | 0.73<br>(0.32)                | 1.88<br>(0.84)    | 1.67<br>(0.74)      | 1.38<br>(0.43)    |
| Market competition for patients in the outpatient intense (=1 if yes) | 1.09<br>(0.26)                | 1.19<br>(0.29)    | 1.11<br>(0.30)      | 1.12<br>(0.17)    |
| <b>Integration†</b>                                                   |                               |                   |                     |                   |
| Clinical: Composite Index {0,1}                                       | 10.74***<br>(7.05)            | 1.06<br>(0.76)    | 3.20*<br>(2.09)     | 2.77*<br>(1.68)   |
| Functional: Composite Index {0,1}                                     | 1.81<br>(1.19)                | 8.63***<br>(6.33) | 26.40***<br>(20.02) | 6.42***<br>(3.93) |
| Cultural: Composite Index {0,1}                                       | 0.72<br>(0.43)                | 0.80<br>(0.53)    | 0.15<br>(0.11)      | 1.14<br>(0.58)    |
| <b>Geography</b>                                                      |                               |                   |                     |                   |
| Urbanicity (=1 if yes)                                                |                               |                   |                     |                   |
| Urban ( <i>reference</i> )                                            |                               |                   |                     |                   |
| Suburban                                                              | 0.54<br>(0.25)                | 0.78<br>(0.52)    | 0.72<br>(0.26)      | 1.07<br>(0.35)    |
| Rural                                                                 | 1.19<br>(0.52)                | 0.50<br>(0.27)    | 0.99<br>(0.32)      | 0.65<br>(0.21)    |
| Region (=1 if yes)                                                    |                               |                   |                     |                   |
| Northeast ( <i>reference</i> )                                        |                               |                   |                     |                   |
| Midwest                                                               | 0.37***<br>(0.12)             | 1.12<br>(0.47)    | 0.60*<br>(0.17)     | 0.40***<br>(0.11) |
| South                                                                 | 0.43***<br>(0.13)             | 0.84<br>(0.34)    | 0.32***<br>(0.10)   | 0.40***<br>(0.13) |
| West                                                                  | 0.51**<br>(0.17)              | 1.06<br>(0.36)    | 0.64<br>(0.23)      | 0.66<br>(0.21)    |
| Observations                                                          | 586                           | 360               | 308                 | 807               |

Abbreviation: EHR: electronic health record.

Notes: †Each integration measure composite index {0,1} is a simple weighted sum of components with equal weight allocated to each component. Each column presents results from separate regressions. Ordered logit regression models, to capture intensity of participation in alternative payment models, were estimated and proportional odds ratios were reported. Standard errors are in parentheses. Inference: \* p<0.10, \*\* p<0.05, \*\*\* p<0.01
